# Supplementary material for: Opto-magnetic capture of individual cells based on visual phenotypes
Source: eLife journal article supplement (doi:10.7554/elife.45239), 2019-04-10
Supplement: supp [file elife-45239-supp-v1.zip]

Archive with 7 entries (7 files):
- elife_poa_e45239_Transparent_Reporting_File.pdf
- elife_poa_e45239_Figure_1_figure_supplement_3.docx
- elife_poa_e45239_Figure_1_figure_supplement_2.docx
- elife_poa_e45239_Figure_6_figure_supplement_1.docx
- elife_poa_e45239_Figure_3_figure_supplement_1.docx
- elife_poa_e45239_Figure_1_figure_supplement_4.docx
- elife_poa_e45239_Figure_1_figure_supplement_1.docx
