# Supplementary material for: Opto-magnetic capture of individual cells based on visual phenotypes
Source: eLife journal article supplement (doi:10.7554/elife.45239), 2019-04-10
Supplement: supp [file elife-45239-supp-v1.zip › elife_poa_e45239_Figure_1_figure_supplement_3.docx]

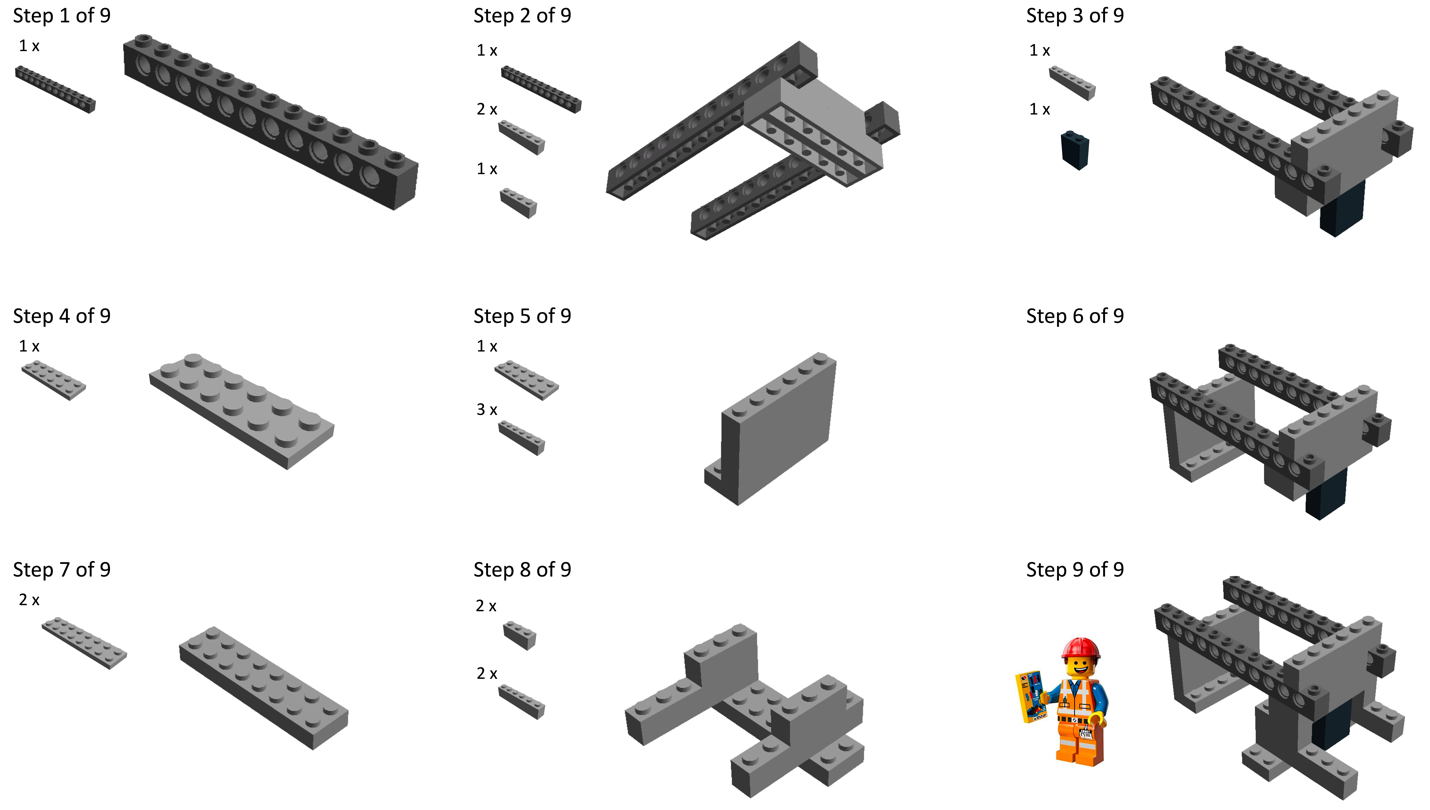


**Figure 1 Supplement 3.** Instructions to create a simple platform to hold both chambers, the magnets and the nail.
