# Supplementary material for: Opto-magnetic capture of individual cells based on visual phenotypes
Source: eLife journal article supplement (doi:10.7554/elife.45239), 2019-04-10
Supplement: supp [file elife-45239-supp-v1.zip › elife_poa_e45239_Figure_1_figure_supplement_4.docx]

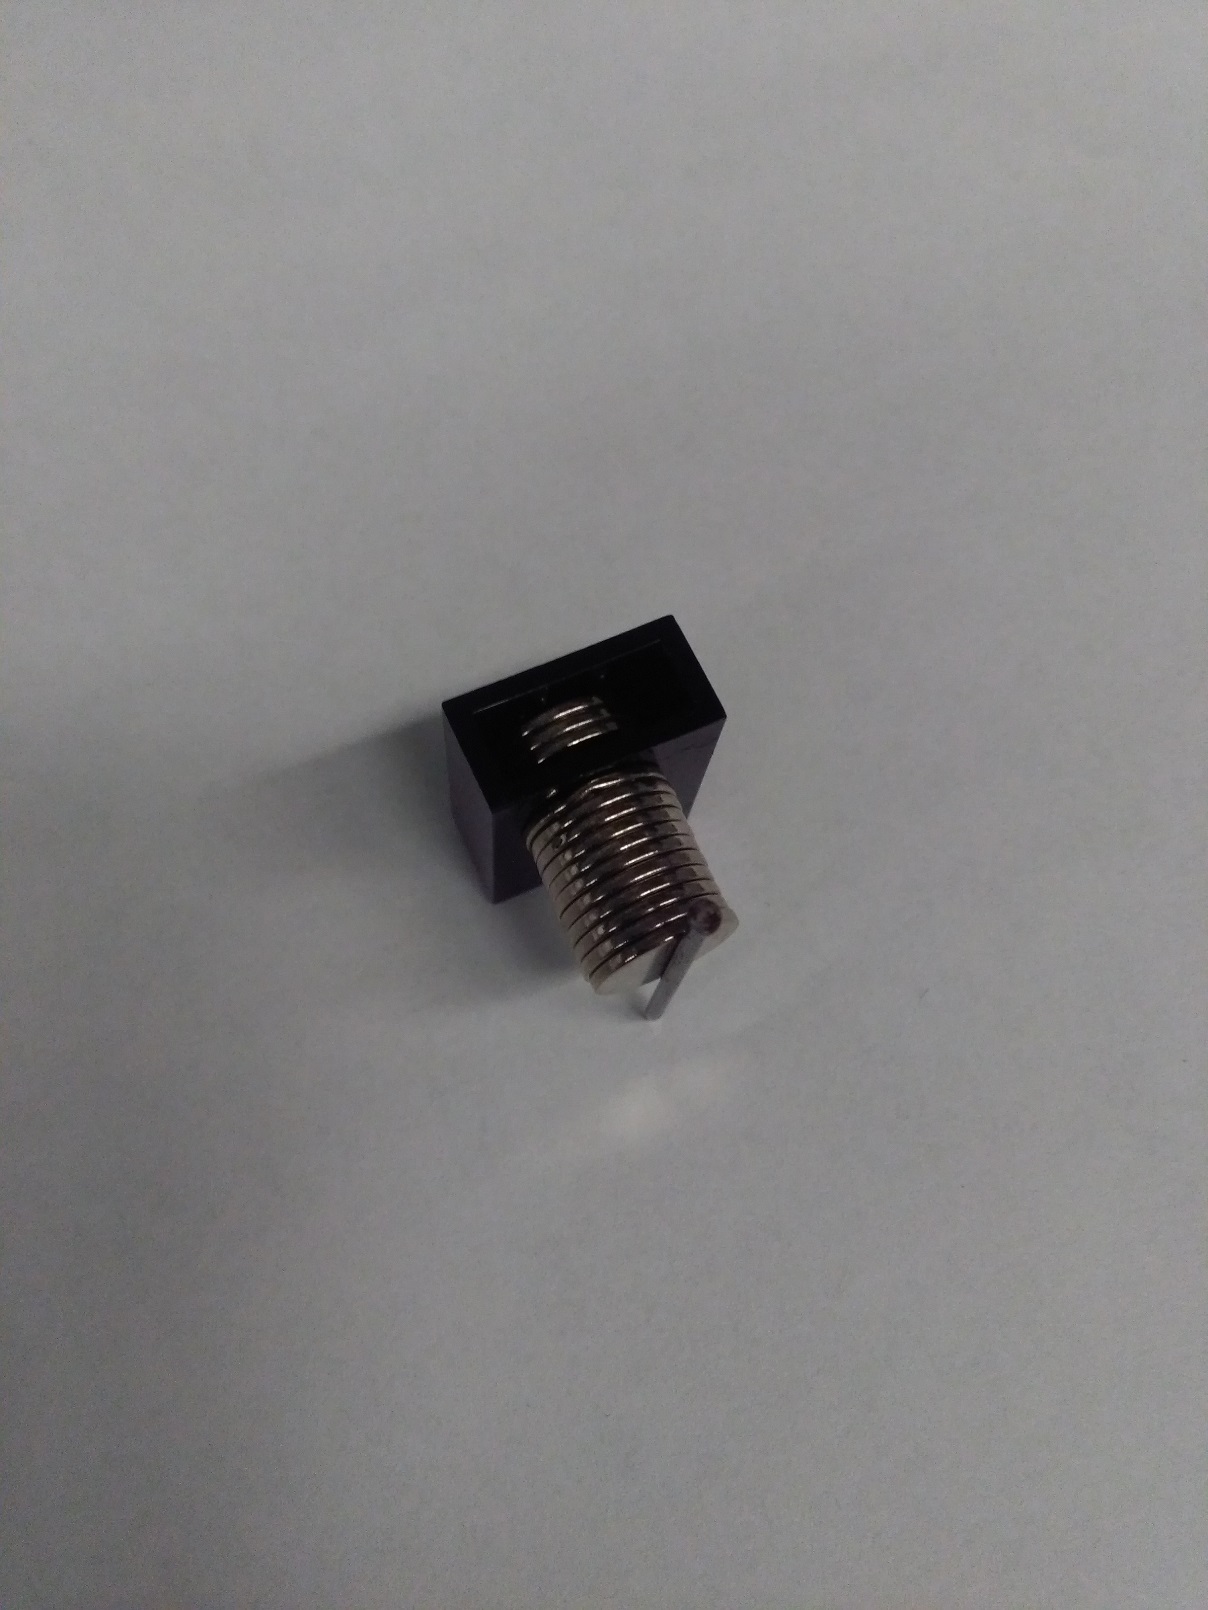


**Figure 1-supplement 4:** Three magnets were inserted inside a hollow Lego brick to magnetically hold the rest of the pile in position for sorting.
