# Supplementary material for: Opto-magnetic capture of individual cells based on visual phenotypes
Source: eLife journal article supplement (doi:10.7554/elife.45239), 2019-04-10
Supplement: supp [file elife-45239-supp-v1.zip › elife_poa_e45239_Figure_3_figure_supplement_1.docx]

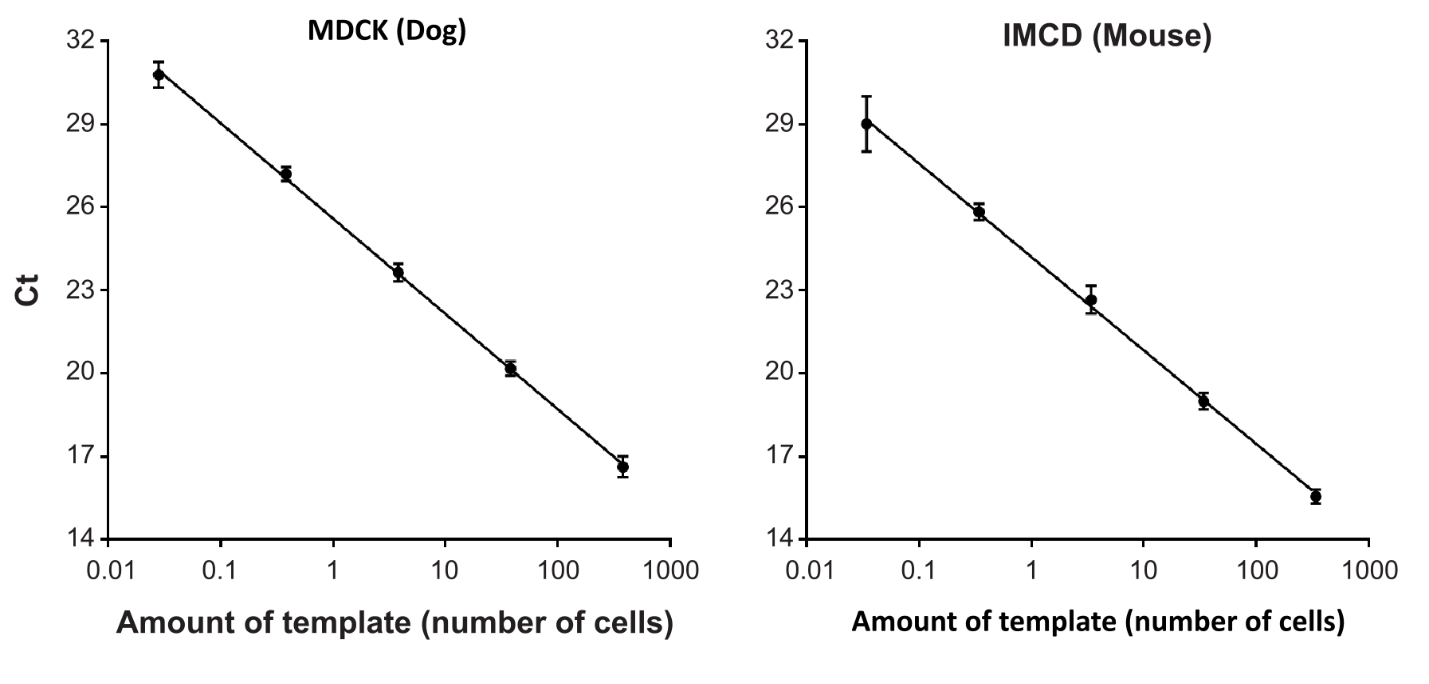


**Figure 3 Supplement 1.** Calibration curves used to calculate the number of cells from qPCR product. Abscises values are in the range of 1/100th of a cell to 100 cells which highlight that our experimental conditions allow detection of an amount of DNA corresponding to less than a cell.
