# Supplementary material for: Opto-magnetic capture of individual cells based on visual phenotypes
Source: eLife journal article supplement (doi:10.7554/elife.45239), 2019-04-10
Supplement: supp [file elife-45239-supp-v1.zip › elife_poa_e45239_Figure_6_figure_supplement_1.docx]

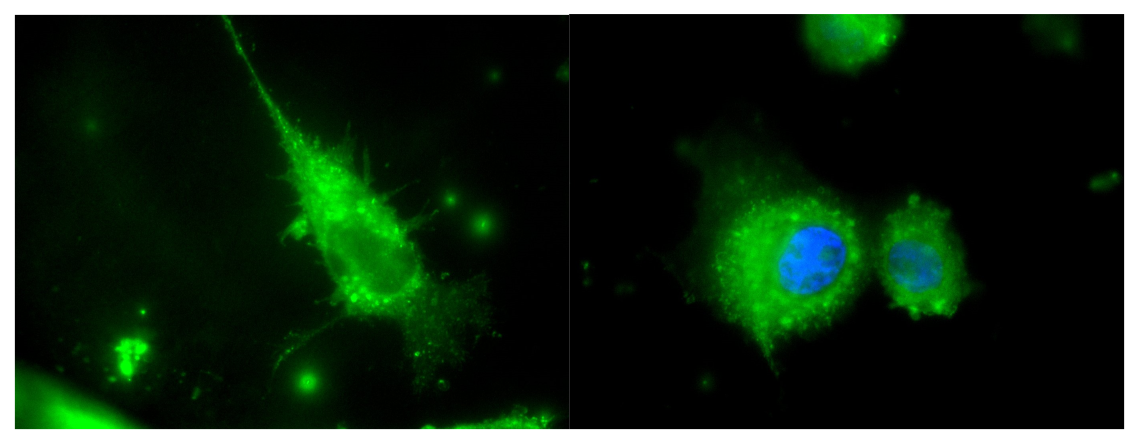


**Figure 6-supplement 1.** Two examples of cells that were killed with sodium azide then stained with mitotracker green and Hoechst. This negative control confirms the cells shown in figure 6 are live cells. When cells are alive, mitotracker green stains filament shaped mitochondria, whereas when cells are dead, the spotty signal it generates is distributed everywhere within the cytoplasm
