# Supplementary material for: Opto-magnetic capture of individual cells based on visual phenotypes
Source: eLife journal article supplement (doi:10.7554/elife.45239), 2019-04-10
Supplement: supp [file elife_poa_e45239_Figure_1_figure_supplement_1.docx]

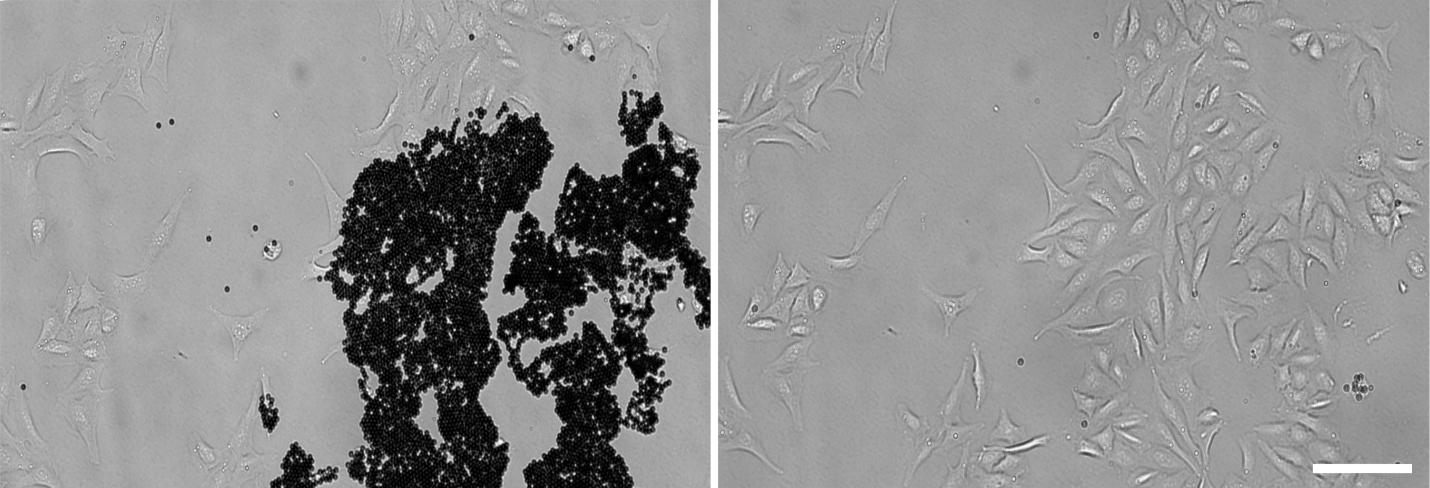


**Figure 1-supplement 1.** Left: A fraction of cells in a culture was tagged with cleavable magnetic beads using scMOCa. Right: after incubation with DNAse, beads are cleaved and cells remain free of beads. Scale bar: 200µm.
