# Supplementary figures and images for: Opto-magnetic capture of individual cells based on visual phenotypes
Source: eLife journal article supplement (doi:10.7554/elife.45239), 2019-04-10

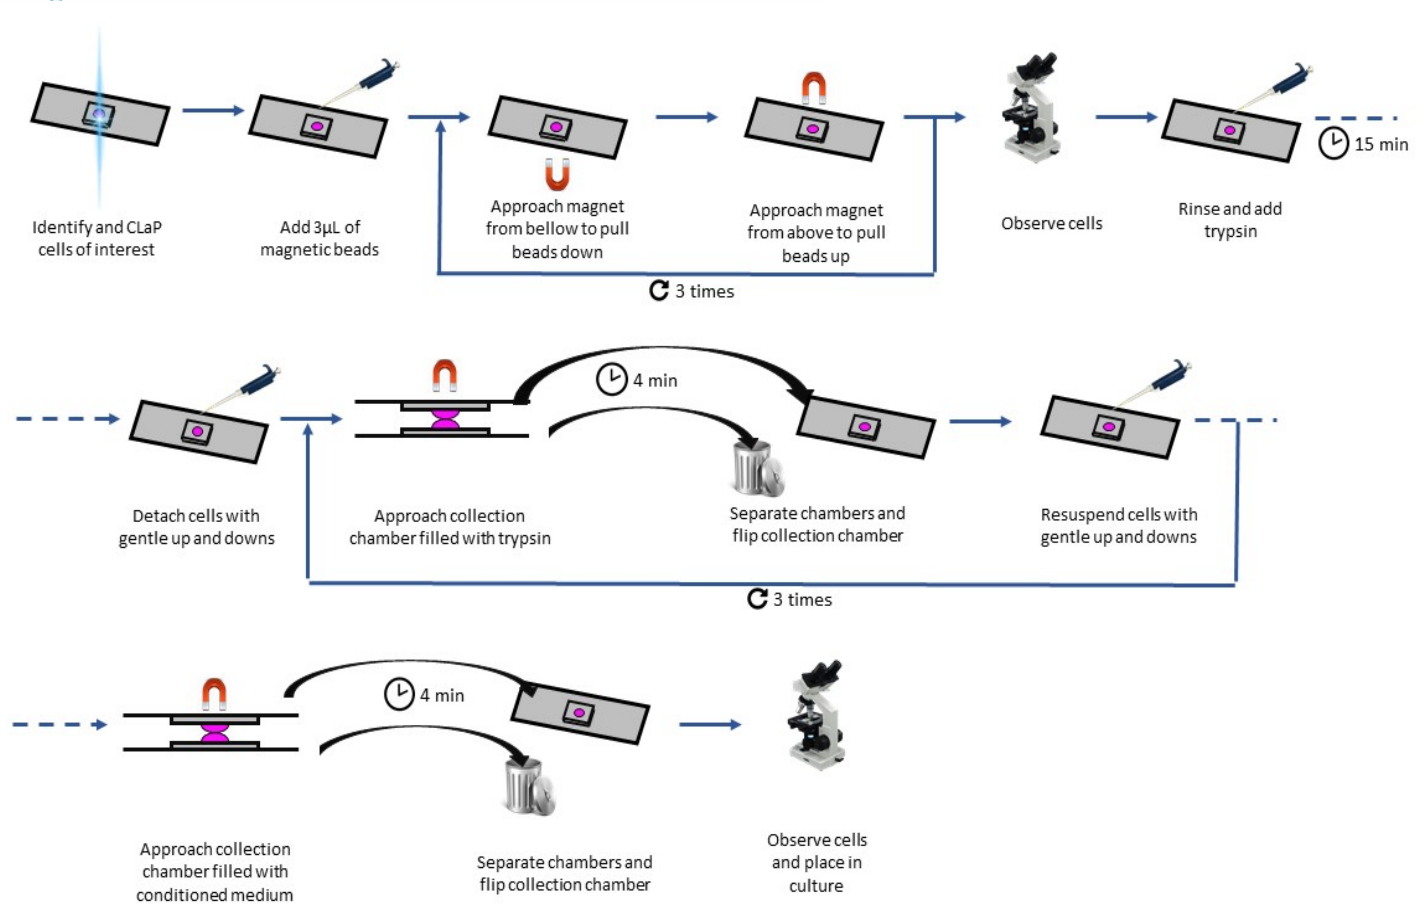


**Figure1-supplement 2:** Step by step protocol to tag and isolate cells using scMOCa.

Supplement: supp [file elife-45239-supp-v1.zip › elife_poa_e45239_Figure_1_figure_supplement_2.docx]
